CORRECTION

## Correction: SpaMWGDA: Identifying spatial domains of spatial transcriptomes using multi-view weighted fusion graph convolutional network and data augmentation

Lin Yuan, Boyuan Meng, Qingxiang Wang, Chunyu Hu, Cuihong Wang, De-Shuang Huang

There is an error in affiliation 4 for author Cuihong Wang. The correct affiliation 4 is: The Second Qilu Hospital of Shandong University, Shandong University, Jinan, China.

### Reference

1. Yuan L, Meng B, Wang Q, Hu C, Wang C, Huang D-S. SpaMWGDA: Identifying spatial domains of spatial transcriptomes using multi-view weighted fusion graph convolutional network and data augmentation. *PLoS Comput Biol*. 2025;21(11):e1013667. <https://doi.org/10.1371/journal.pcbi.1013667> PMID: [41223185](https://pubmed.ncbi.nlm.nih.gov/41223185/)

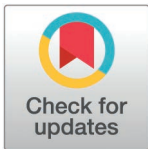

### OPEN ACCESS

**Citation:** Yuan L, Meng B, Wang Q, Hu C, Wang C, Huang D-S (2026) Correction: SpaMWGDA: Identifying spatial domains of spatial transcriptomes using multi-view weighted fusion graph convolutional network and data augmentation. *PLoS Comput Biol* 22(1): e1013877. <https://doi.org/10.1371/journal.pcbi.1013877>

**Published:** January 6, 2026

**Copyright:** © 2026 Yuan et al. This is an open access article distributed under the terms of the [Creative Commons Attribution License](https://creativecommons.org/licenses/by/4.0/), which permits unrestricted use, distribution, and reproduction in any medium, provided the original author and source are credited.
